# Supplementary material
Source: Springer Nature journal article supplement (https://www.springermedizin.de/resource/supplementary/12875_2013_1013_MOESM5_ESM.pdf/9435934)
Supplement: MOESM5 [file 9435934]

**Table 5. Management of depression as indicated by study doctors**

| How is the patient currently being managed?                                                        | <i>n</i> (%) |
|----------------------------------------------------------------------------------------------------|--------------|
| Mode of depression management ( <i>N</i> =618)                                                     |              |
| Prescribed medication                                                                              | 313 (50.6%)  |
| Counseling provided                                                                                | 259 (41.9%)  |
| Follow-up scheduled                                                                                | 240 (38.8%)  |
| Currently under care of another professional                                                       | 190 (30.7%)  |
| Being observed                                                                                     | 180 (29.1%)  |
| Referred to health care professional                                                               | 53 (8.6%)    |
| Patient refused follow-up                                                                          | 1 (0.002%)   |
| Follow-up: Types of medications prescribed ( <i>n</i> =313)                                        |              |
| Antidepressants                                                                                    | 263 (84.0%)  |
| Benzodiazepines                                                                                    | 70 (22.4%)   |
| Z-class drugs                                                                                      | 41 (13.1%)   |
| Anti-psychotics                                                                                    | 26 (8.3%)    |
| Others (herbal treatments, antihistamines, beta blockers, anti-epileptic agents, food supplements) | 30 (9.6%)    |
| Follow-up: Types of counselling provided ( <i>n</i> =259)                                          |              |
| Supportive                                                                                         | 215 (83.0%)  |
| Problem-solving                                                                                    | 49 (18.9%)   |
| Cognitive behavioural therapy                                                                      | 36 (13.9%)   |
| Activity planning                                                                                  | 31 (12.0%)   |
| Others (hypnosis, interpersonal therapy, family therapy, relaxation techniques)                    | 6 (2.3%)     |
| Follow-up: Types of health professionals referred ( <i>n</i> =53)                                  |              |
| Government-funded psychiatric services                                                             | 12 (22.6%)   |
| Private Psychiatrist                                                                               | 4 (7.5%)     |
| Counsellor                                                                                         | 18 (34.0%)   |
| Social Worker                                                                                      | 3 (5.7%)     |
| Psychologist                                                                                       | 7 (13.2%)    |
| Emergency department                                                                               | 1 (1.9%)     |
| Others (IMHP, professional not specified)                                                          | 11 (20.8%)   |

*Note.* Total percentage can exceed 100% as multiple responses were permitted.

IMHP = Integrated Mental Health Program of the Hong Kong Hospital Authority
